# Supplementary material for: Thermal Diffusivity and Conductivity of Polyolefins by Thermal Lens Technique
Source: MDPI journal article supplement (doi:10.3390/polym14132707), 2022-07-01
Supplement: s1 [file s1]

# Supporting information for

## Thermal Diffusivity and Conductivity of Polyolefins by Thermal Lens Technique

Behnaz Abbasgholi-NA <sup>1,2</sup>, Seyed Reza Nokhbeh <sup>3</sup>, Osamah A. Aldaghri <sup>4</sup>, Khalid Hassan Ibnaouf <sup>4</sup>,  
Nawal Madkhali <sup>4,\*</sup> and Humberto Cabrera <sup>1\*</sup>

<sup>1</sup> Optics Lab, STI Unit, The Abdus Salam International Centre for Theoretical Physics, Trieste 34151, Italy

<sup>2</sup> NanoInnovation Laboratory, Elettra-Sincrotrone Trieste S.C.P.A, Trieste, Italy

<sup>3</sup> Department of Chemistry, Ferdowsi University of Mashhad, Mashhad, Iran

<sup>4</sup> Physics Department, College of Sciences, Imam Mohammad Ibn Saud Islamic University (IMSIU), Riyadh 13318, Saudi Arabia; odaghri@imamu.edu.sa (O.A.A.); khiahmed@imamu.edu.sa (K.H.I.)

\* Correspondence: hcabrera@ictp.it (H.C.); namadkhali@imamu.edu.sa (N.M.)

| <b>Figures &amp; Table</b> |                                                                 | <b>page</b> |
|----------------------------|-----------------------------------------------------------------|-------------|
| <b>Fig. S1</b>             | <b>Thermogram for calculation of Cp of HDPE</b>                 | <b>2</b>    |
| <b>Fig. S2</b>             | <b>Thermogram for calculation of Cp of LLDPE</b>                | <b>3</b>    |
| <b>Fig. S3</b>             | <b>Thermogram for calculation of Cp of LDPE</b>                 | <b>3</b>    |
| <b>Fig. S4</b>             | <b>Thermogram for calculation of Cp of PP</b>                   | <b>4</b>    |
| <b>Fig. S5</b>             | <b>DSC Thermogram for calculation of crystallinity of PP</b>    | <b>4</b>    |
| <b>Fig. S6</b>             | <b>DSC Thermogram for calculation of crystallinity of HDPE</b>  | <b>5</b>    |
| <b>Fig. S7</b>             | <b>DSC Thermogram for calculation of crystallinity of LLDPE</b> | <b>5</b>    |
| <b>Fig. S8</b>             | <b>DSC Thermogram for calculation of crystallinity of LDPE</b>  | <b>6</b>    |
| <b>Fig. S9</b>             | <b>GPC chromatogram of HDPE</b>                                 | <b>6</b>    |
| <b>Fig. S10</b>            | <b>Diagram of log Mw vs Retention Time for HDPE</b>             | <b>6</b>    |
| <b>Fig. S11</b>            | <b>Diagram of dw/dlogM vs log Mw for HDPE</b>                   | <b>7</b>    |
| <b>Fig. S12</b>            | <b>Diagram of Rg vs log Mw for HDPE</b>                         | <b>7</b>    |
| <b>Fig. S13</b>            | <b>Diagram of IV and g' vs log Mw for HDPE</b>                  | <b>7</b>    |
| <b>Fig. S14</b>            | <b>GPC chromatogram of LLDPE</b>                                | <b>8</b>    |
| <b>Fig. S15</b>            | <b>Diagram of log Mw vs Retention Time for LLDPE</b>            | <b>8</b>    |
| <b>Fig. S16</b>            | <b>Diagram of dw/dlogM vs log Mw for LLDPE</b>                  | <b>8</b>    |
| <b>Fig. S17</b>            | <b>Diagram of Rg vs log Mw for LLDPE</b>                        | <b>9</b>    |
| <b>Fig. S18</b>            | <b>Diagram of IV and g' vs log Mw for LLDPE</b>                 | <b>9</b>    |
| <b>Fig. S19</b>            | <b>GPC chromatogram of LDPE</b>                                 | <b>9</b>    |
| <b>Fig. S20</b>            | <b>Diagram of log Mw vs Retention Time for LDPE</b>             | <b>10</b>   |

|          |                                                                                                                   |    |
|----------|-------------------------------------------------------------------------------------------------------------------|----|
| Fig. S21 | Diagram of $dw/d\log M$ vs $\log M_w$ for LDPE                                                                    | 10 |
| Fig. S22 | Diagram of IV and $g'$ vs $\log M_w$ for LDPE                                                                     | 10 |
| Fig. S23 | Diagram of $R_g$ vs $\log M_w$ for LDPE                                                                           | 11 |
| Fig. S24 | GPC chromatogram of PP                                                                                            | 11 |
| Fig. S25 | Diagram of $\log M_w$ vs Retention Time for PP                                                                    | 11 |
| Fig. S26 | Diagram of $dw/d\log M$ vs $\log M_w$ for PP                                                                      | 12 |
| Fig. S27 | Diagram of IV and $g'$ vs $\log M_w$ for PP                                                                       | 12 |
| Fig. S28 | Diagram of $R_g$ vs $\log M_w$ for PP                                                                             | 12 |
| Table S1 | Average molecular weights, PDI, weight fraction, and bulk intrinsic viscosity of samples obtained by GPC analysis | 13 |

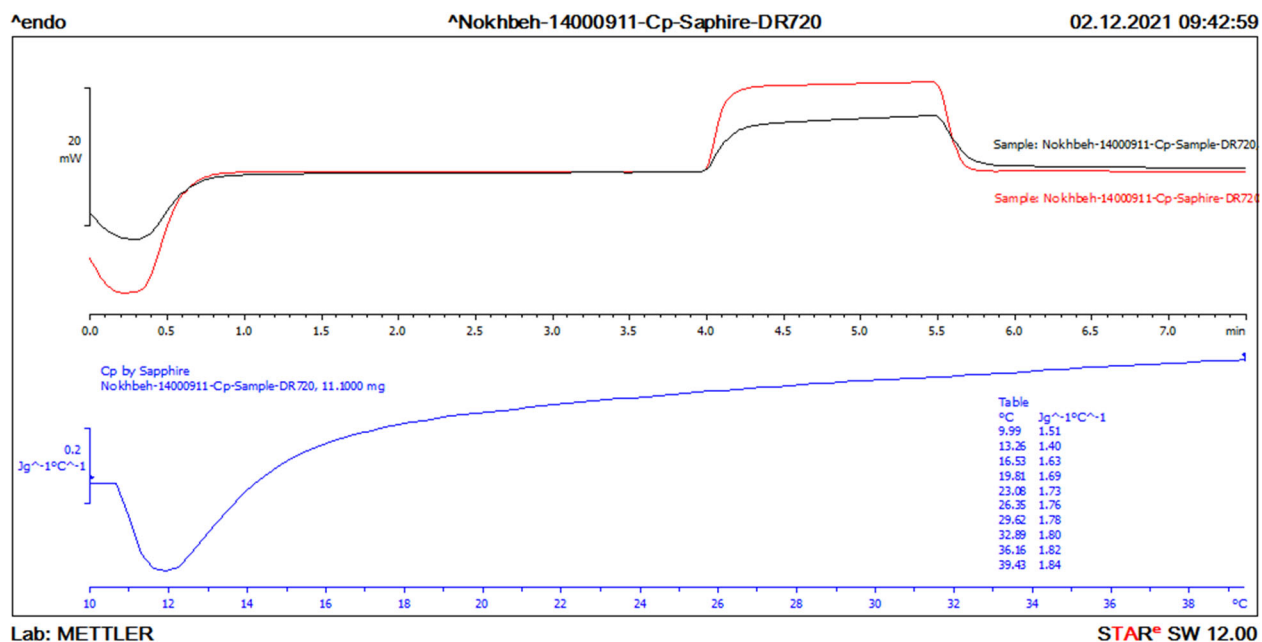

**Figure S1:** Thermogram for calculation of  $C_p$  of HDPE

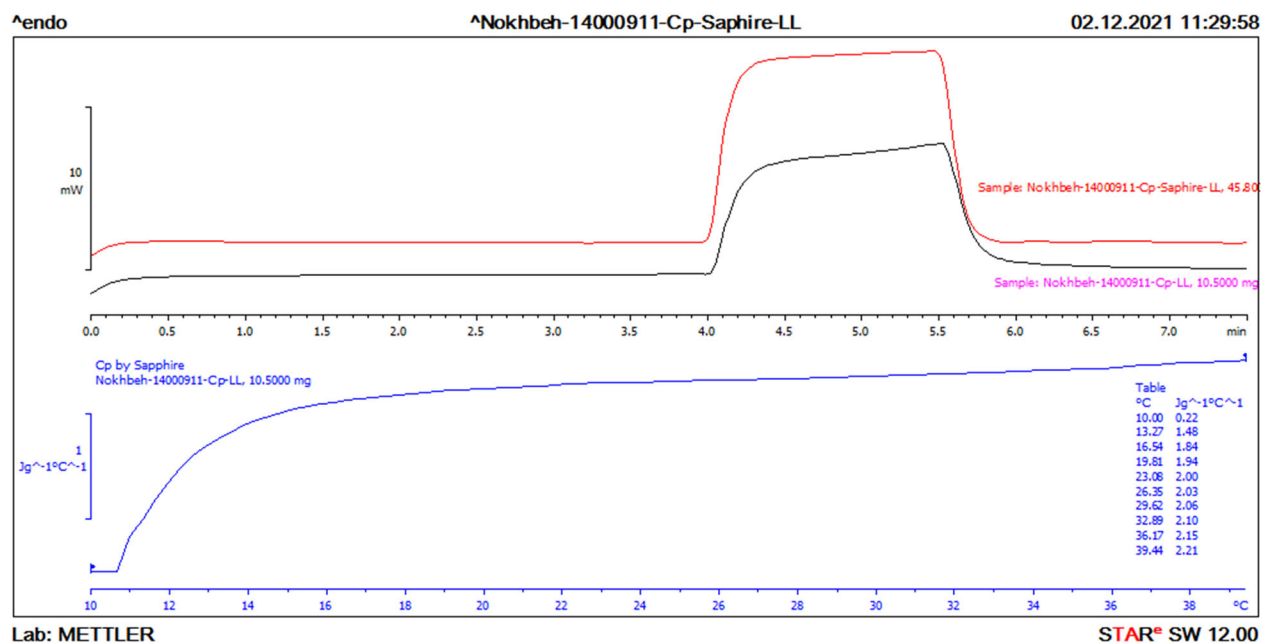

Figure S2: Thermogram for calculation of Cp of LLDPE

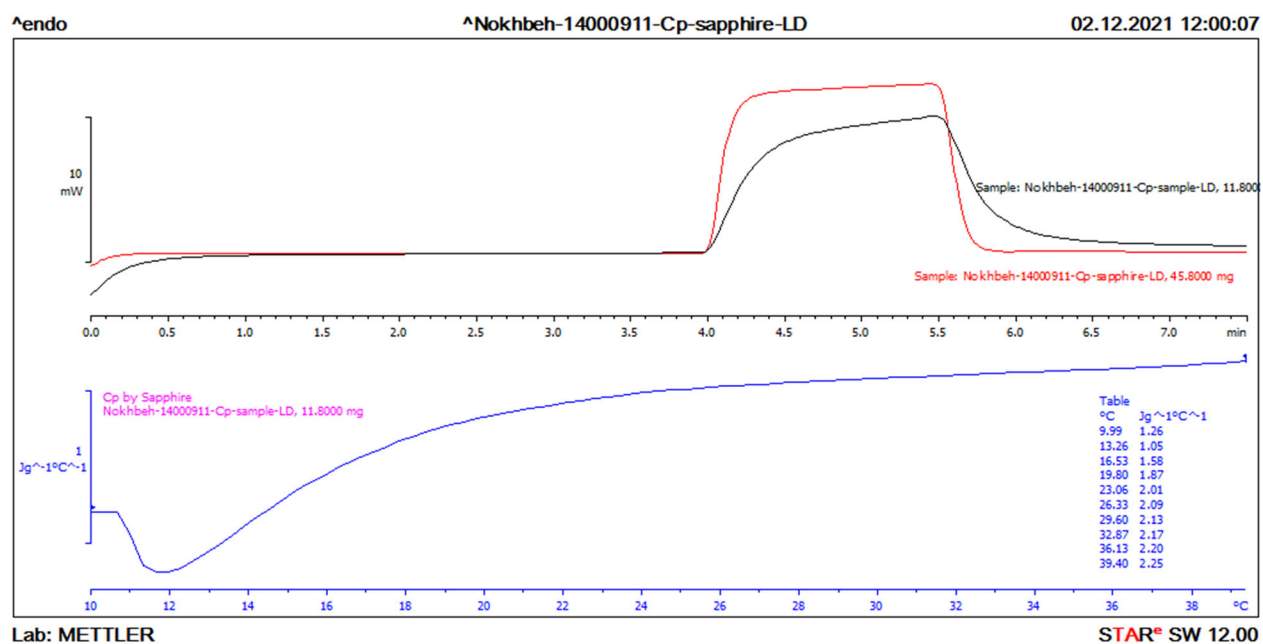

Figure S3: Thermogram for calculation of Cp of LDPE

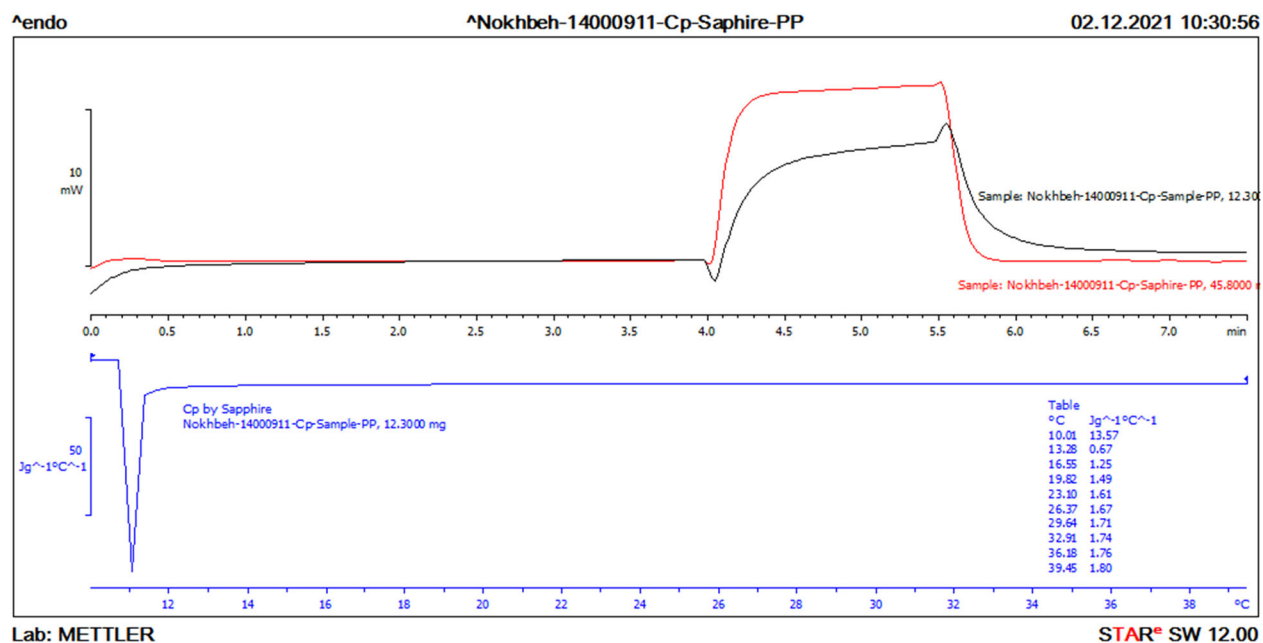

**Figure S4:** Thermogram for calculation of Cp of PP

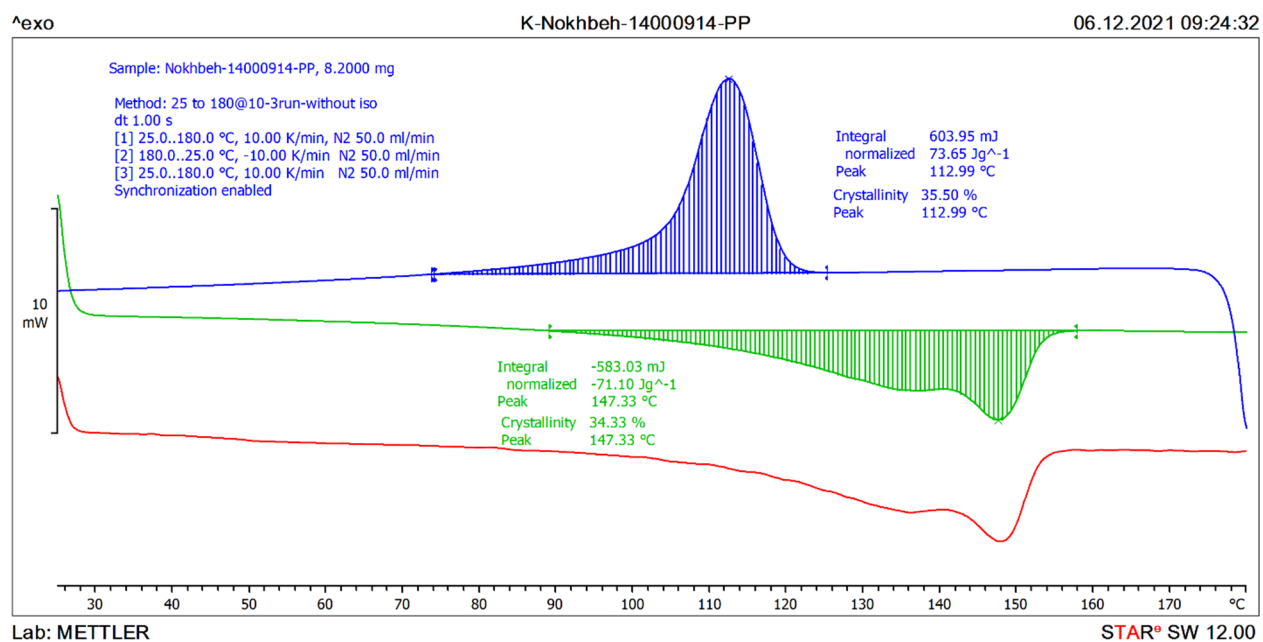

**Figure S5:** DSC Thermogram for calculation of crystallinity of PP

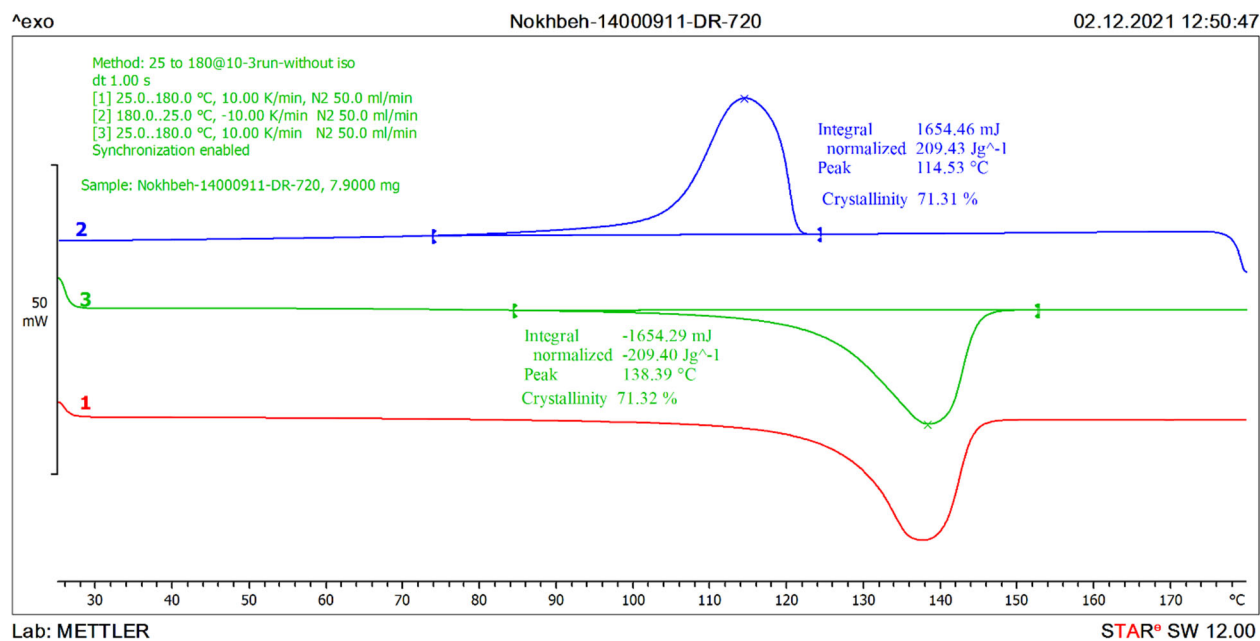

**Figure S6:** DSC Thermogram for calculation of crystallinity of HDPE

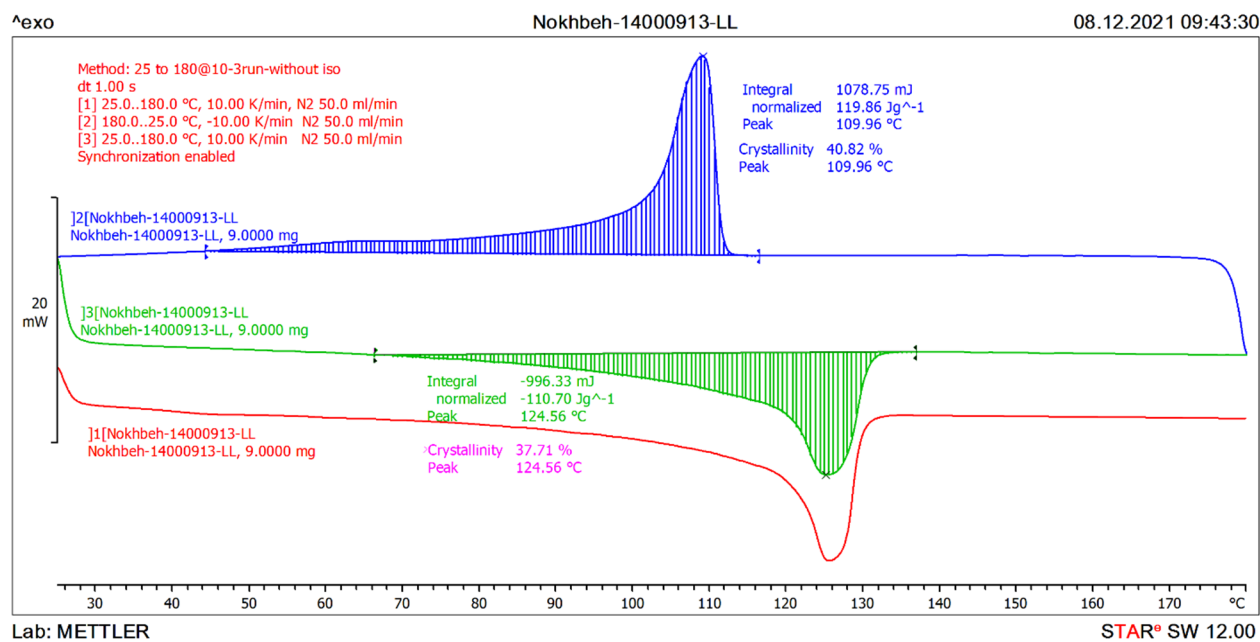

**Figure S7:** DSC Thermogram for calculation of crystallinity of LLDPE

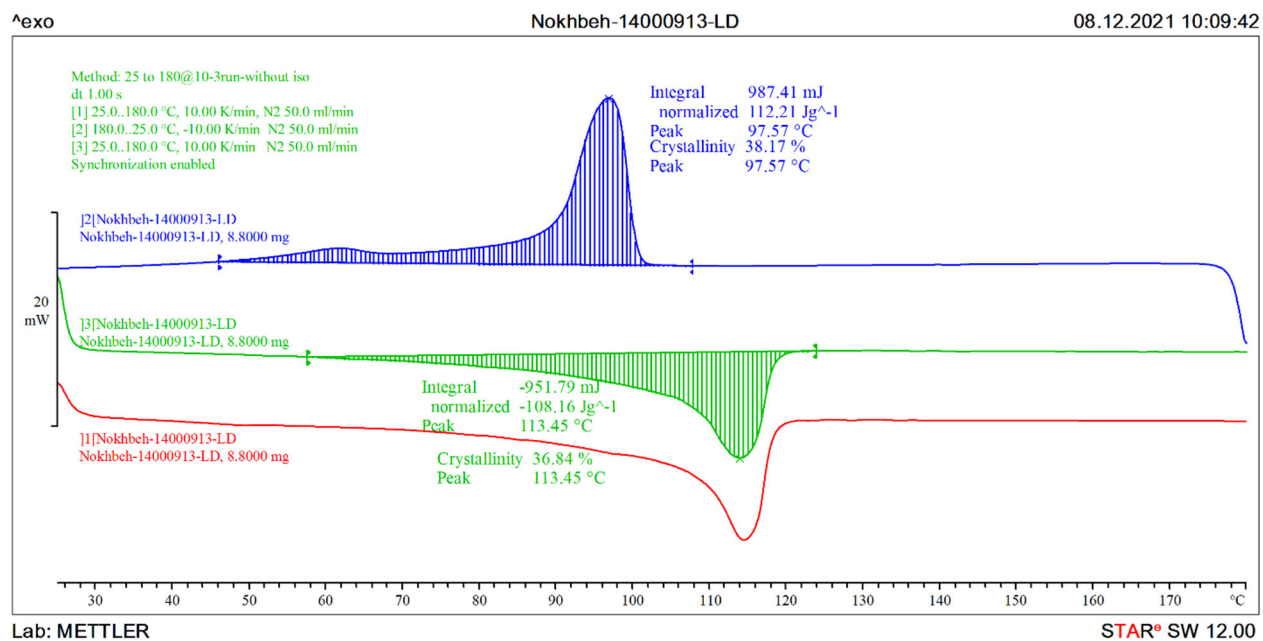

**Figure S8:** DSC Thermogram for calculation of crystallinity of LDPE

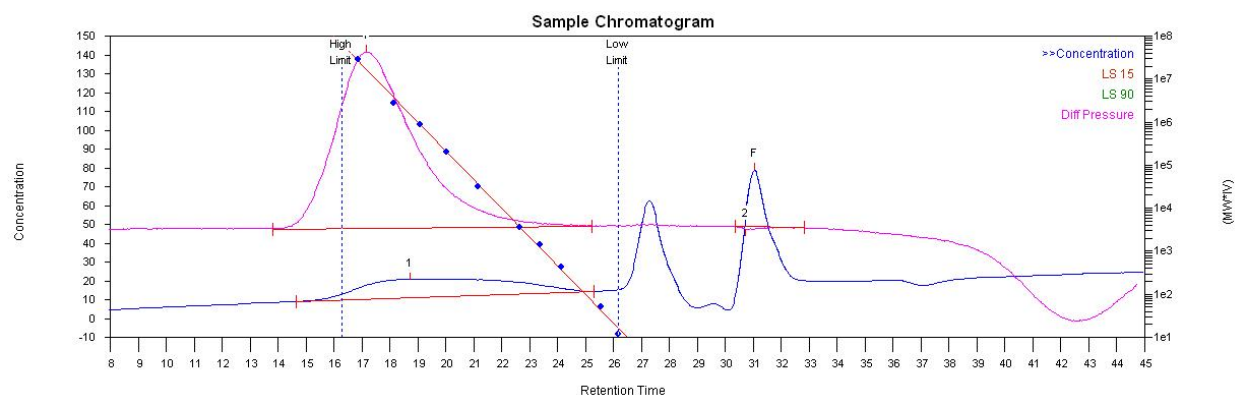

**Figure S9:** GPC chromatogram of HDPE

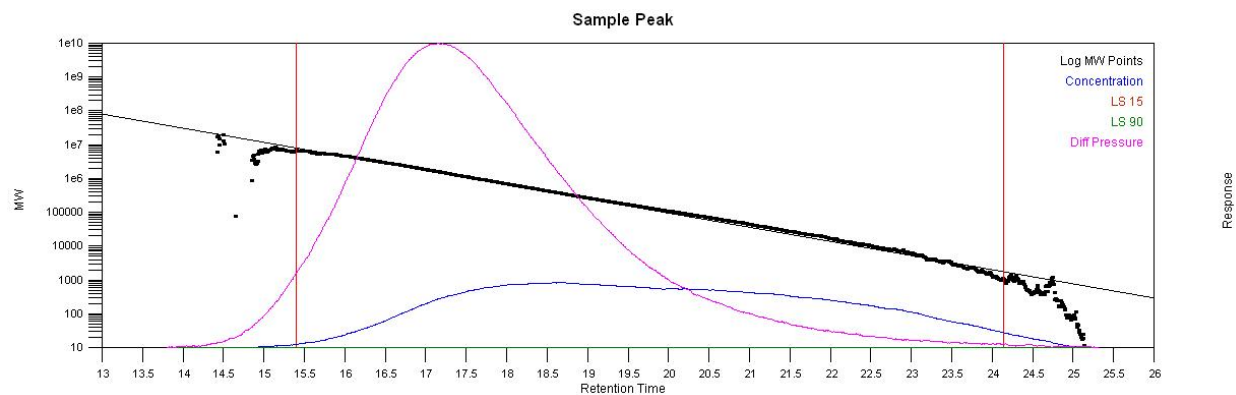

**Figure S10:** Diagram of log Mw vs Retention Time for HDPE

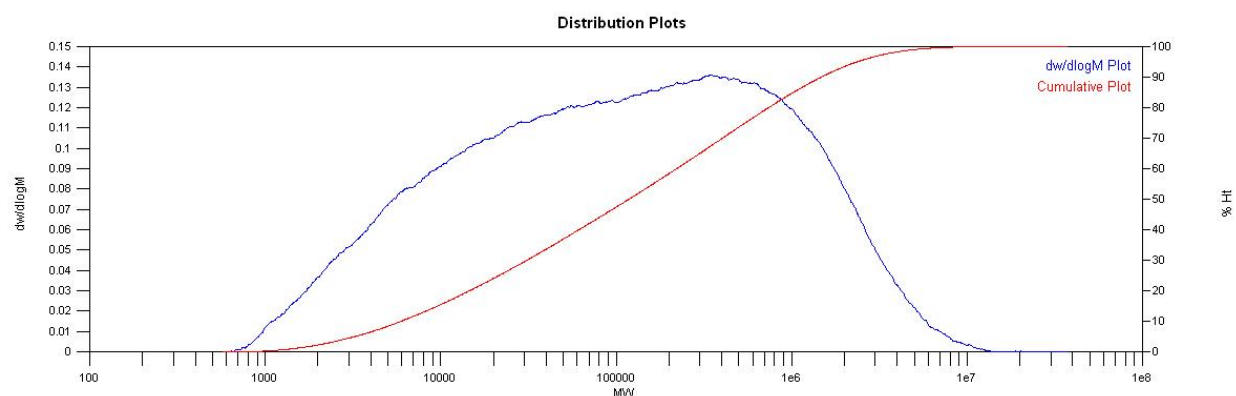

**Figure S11:** Diagram of  $dw/d\log M$  vs log Mw for HDPE

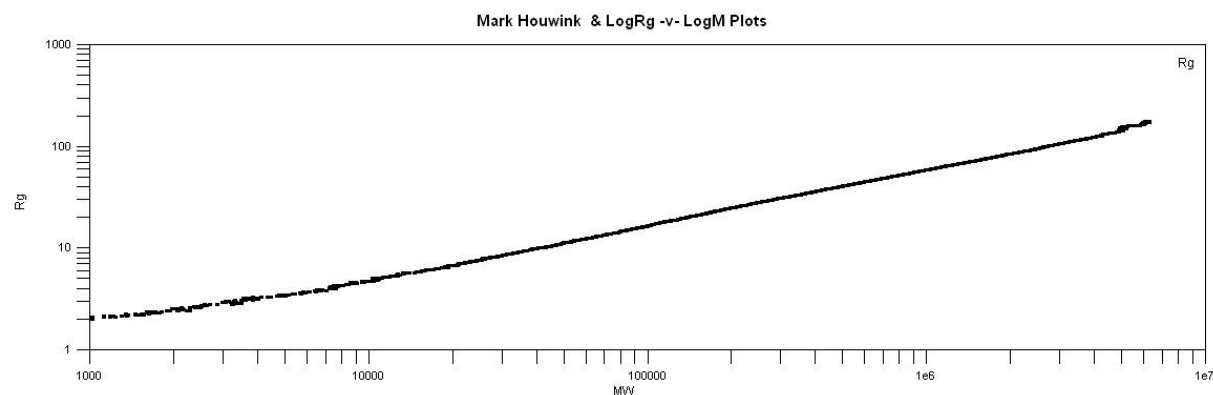

**Figure S12:** Diagram of  $R_g$  vs log Mw for HDPE

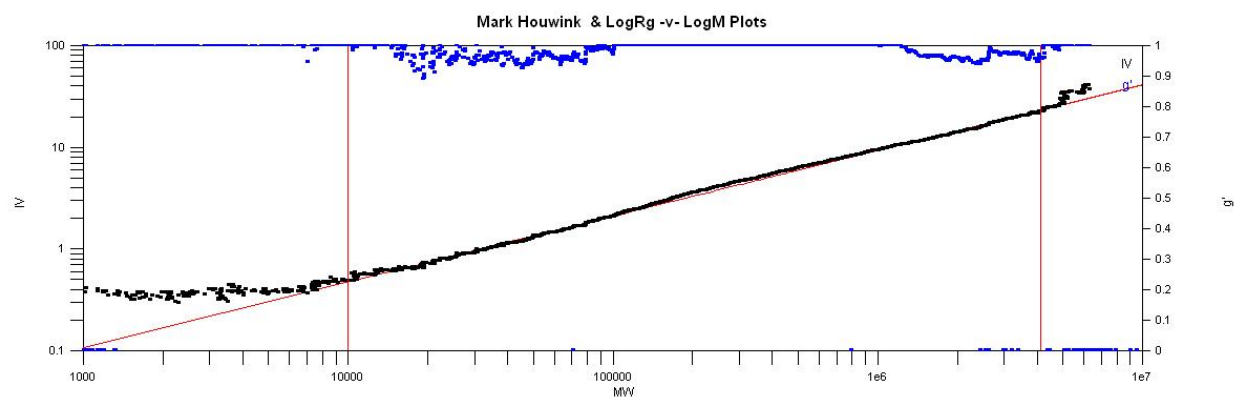

**Figure S13:** Diagram of IV and  $g'$  vs log Mw for HDPE

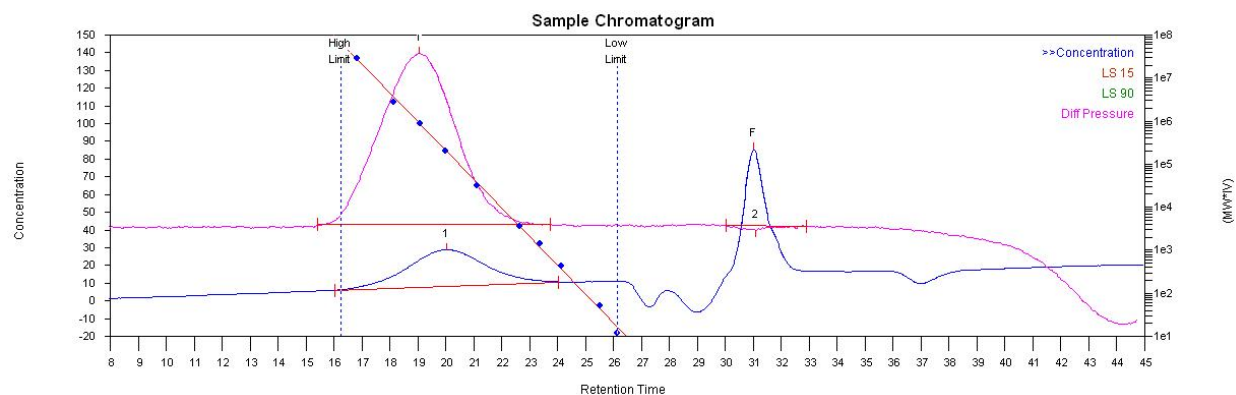

**Figure S14:** GPC chromatogram of LLDPE

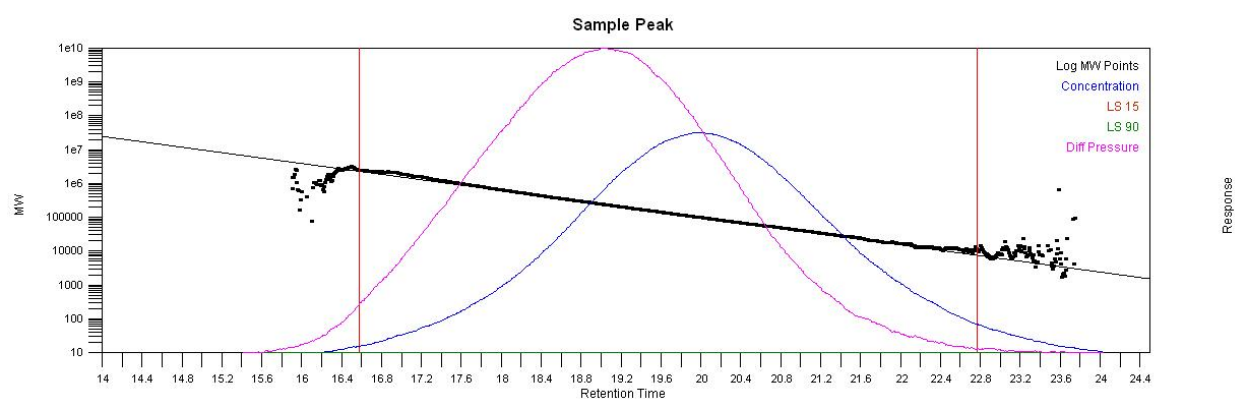

**Figure S15:** Diagram of log Mw vs Retention Time for LLDPE

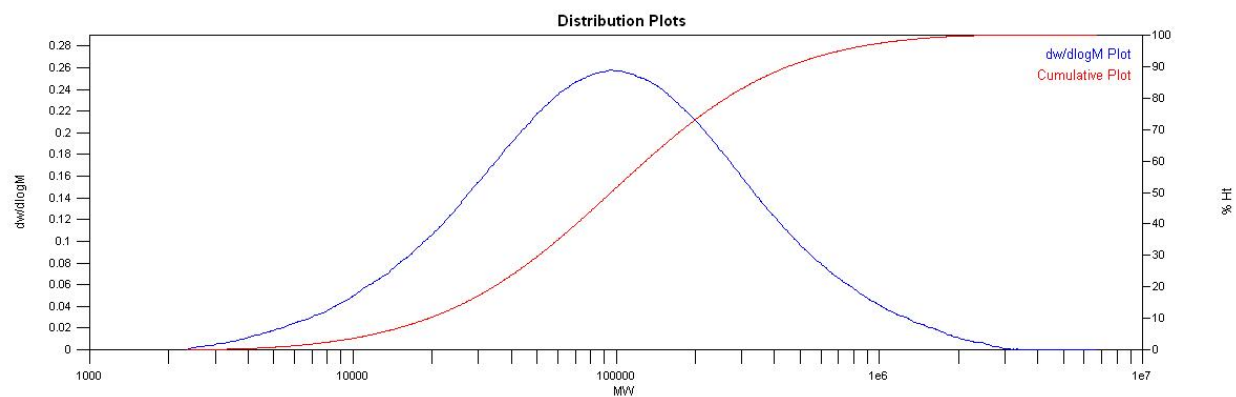

**Figure S16:** Diagram of  $dw/d\log M$  vs log Mw for LLDPE



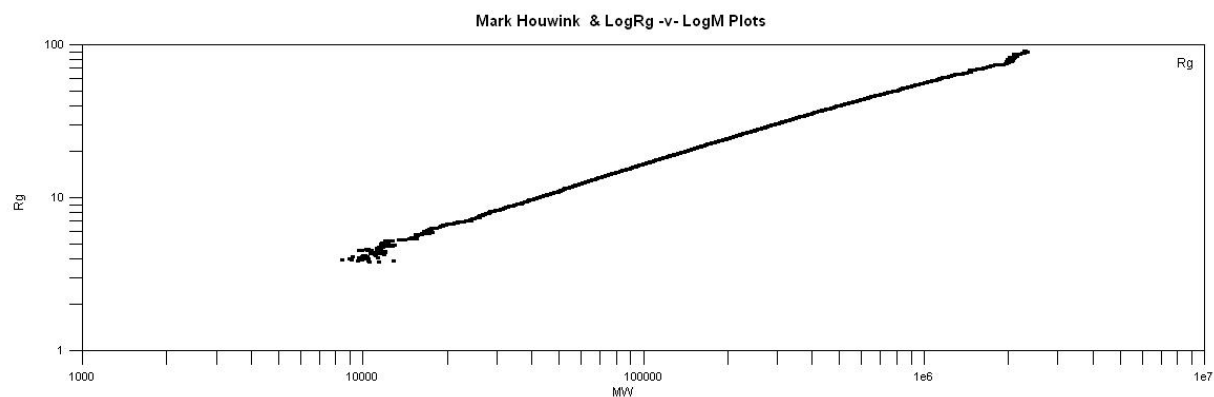

**Figure S17:** Diagram of  $R_g$  vs  $\log M_w$  for LLDPE

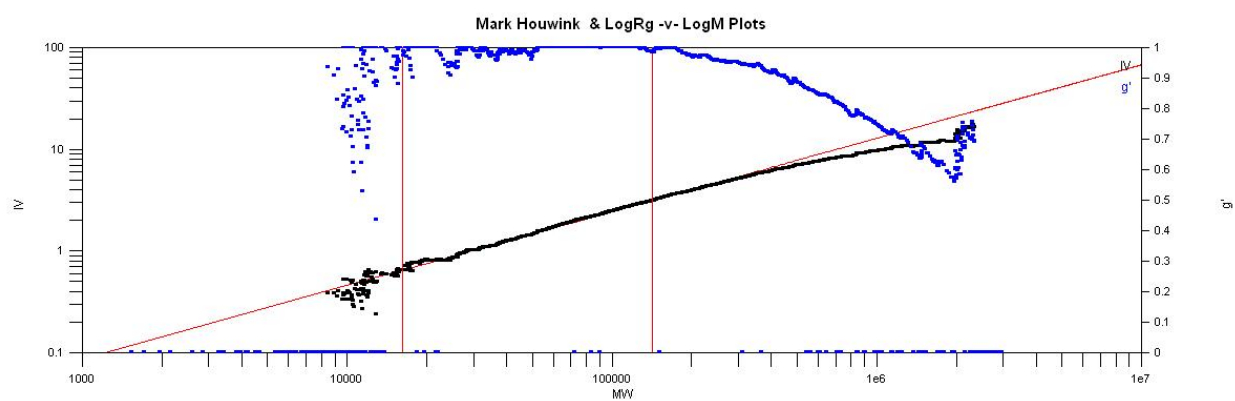

**Figure S18:** Diagram of  $IV$  and  $g'$  vs  $\log M_w$  for LLDPE

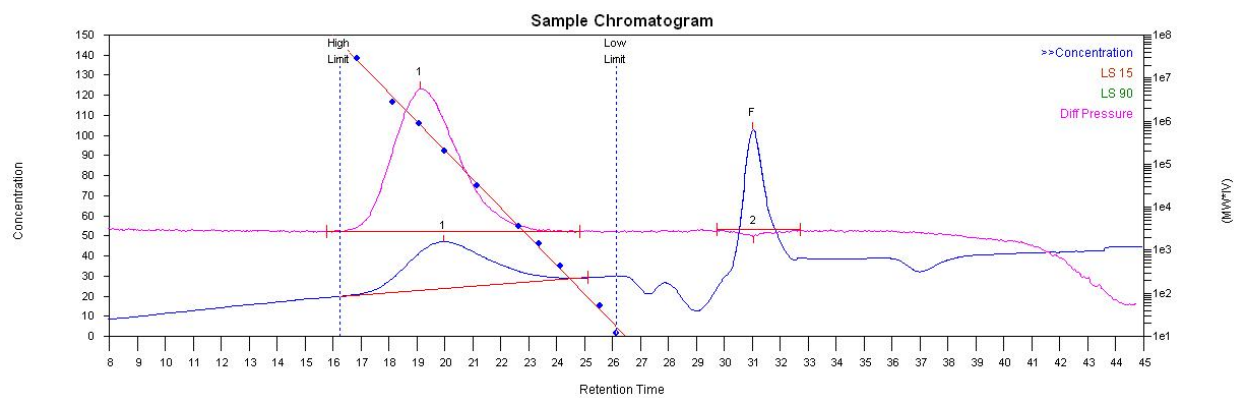

**Figure S19:** GPC chromatogram of LDPE

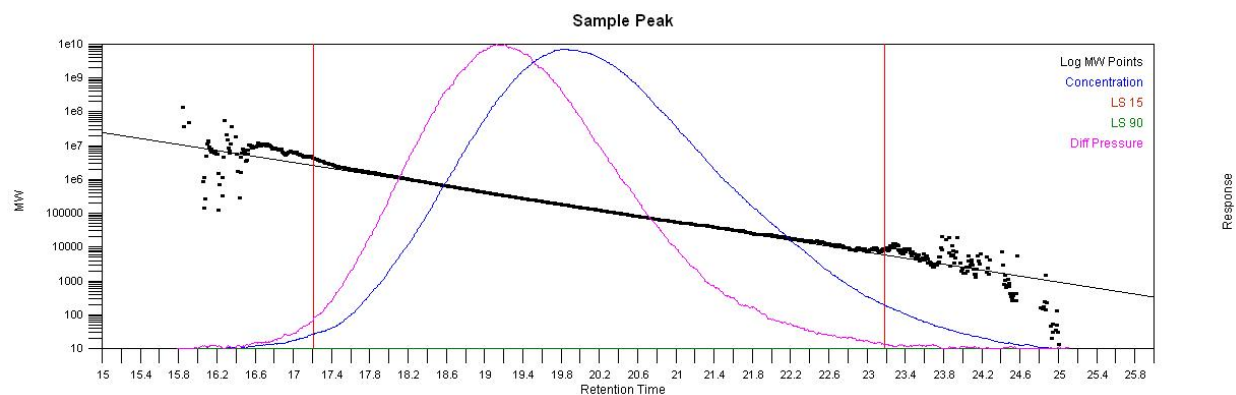

**Figure S20:** Diagram of log Mw vs Retention Time for LDPE

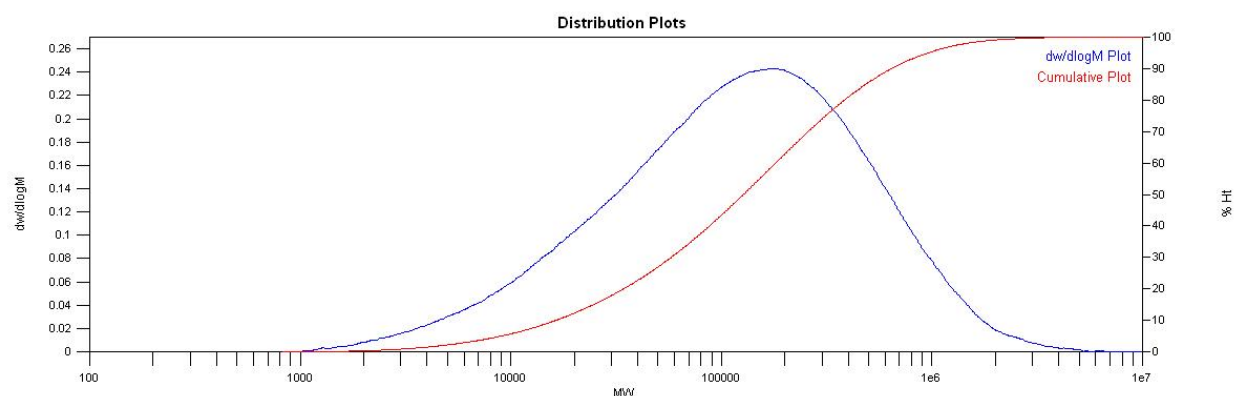

**Figure S21:** Diagram of dw/dlogM vs log Mw for LDPE

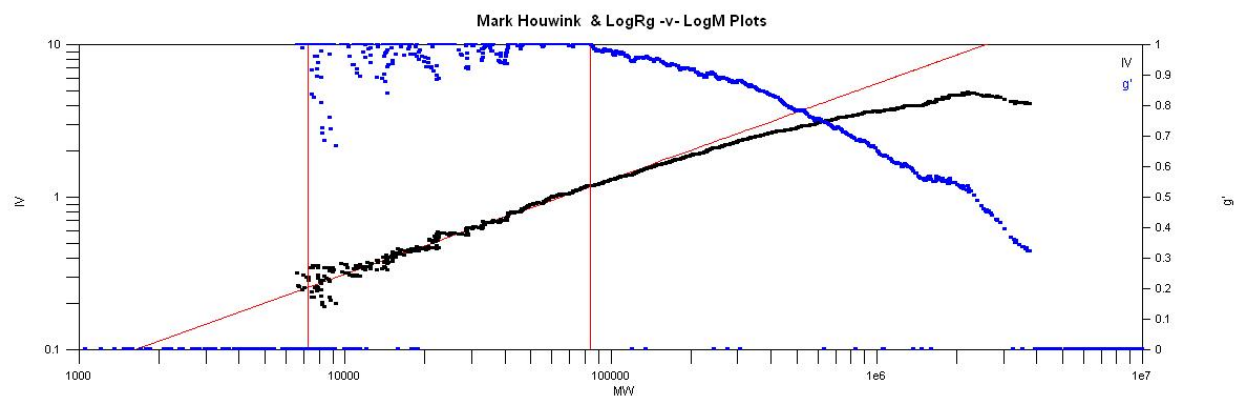

**Figure S22:** Diagram of IV and g' vs log Mw for LDPE

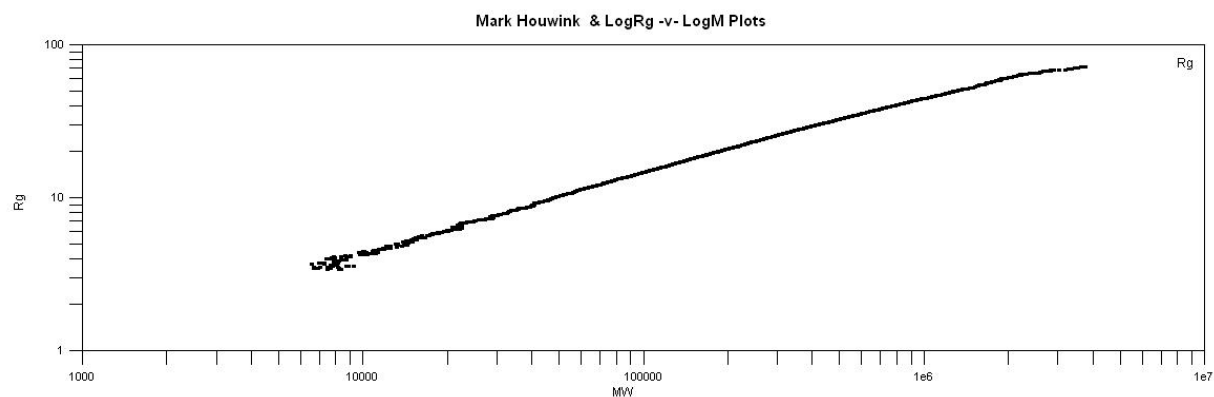

**Figure S23:** Diagram of  $R_g$  vs log  $M_w$  for LDPE

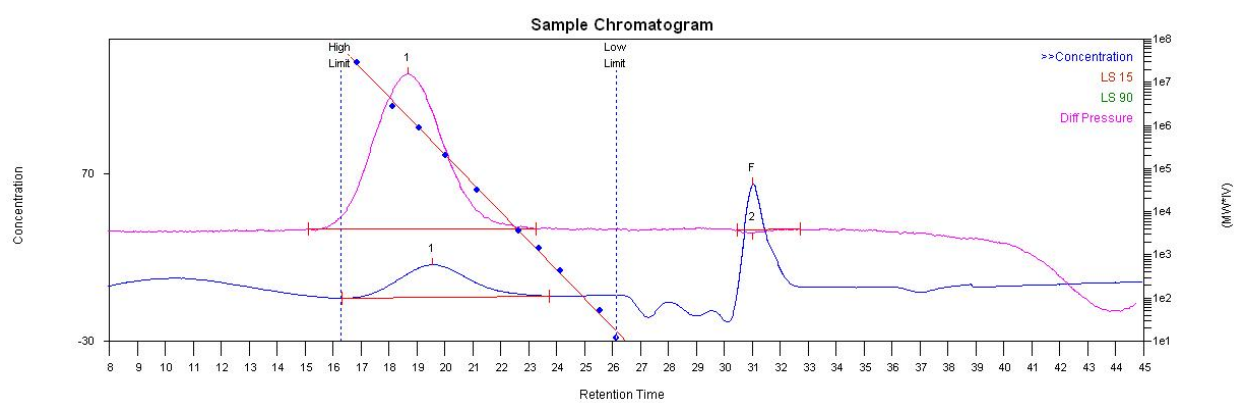

**Figure S24:** GPC chromatogram of PP

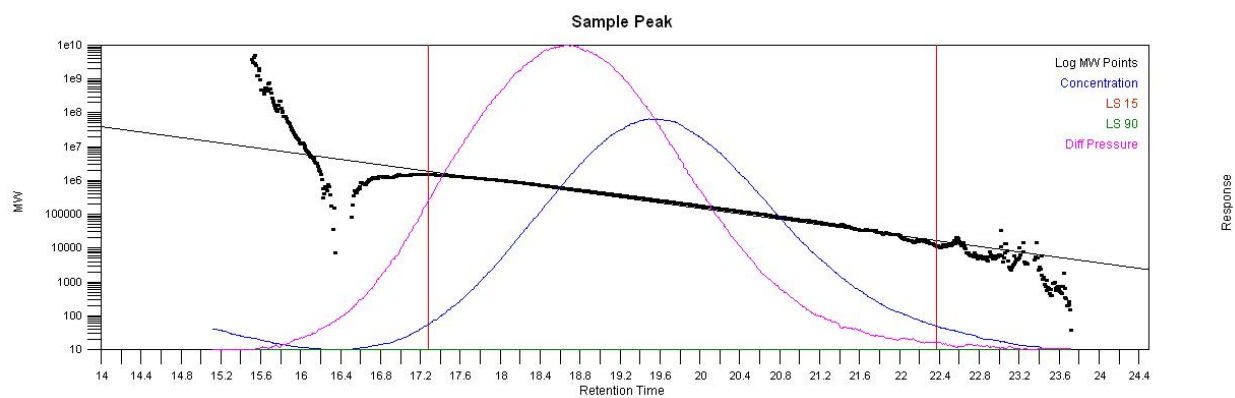

**Figure S25:** Diagram of log  $M_w$  vs Retention Time for PP

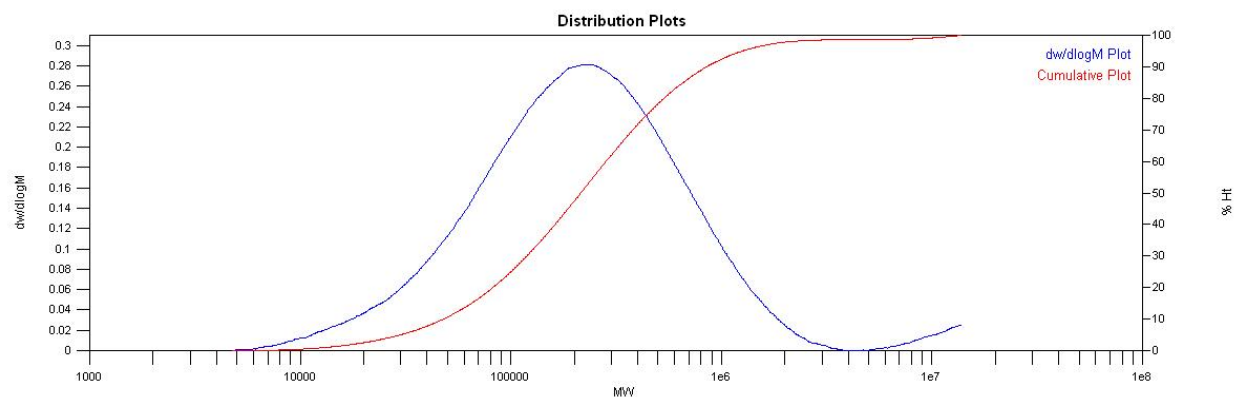

**Figure S26:** Diagram of  $dw/d\log M$  vs  $\log M_w$  for PP

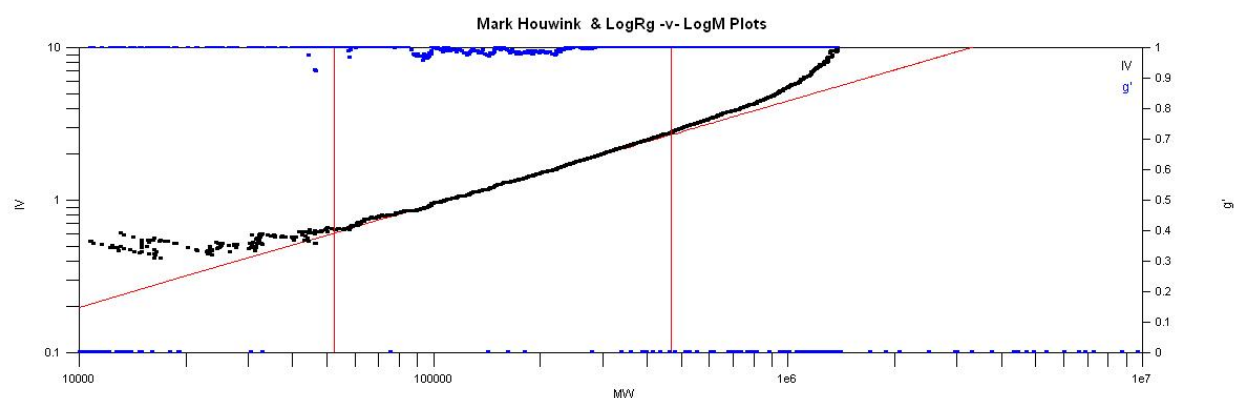

**Figure S27:** Diagram of IV and  $g'$  vs  $\log M_w$  for PP

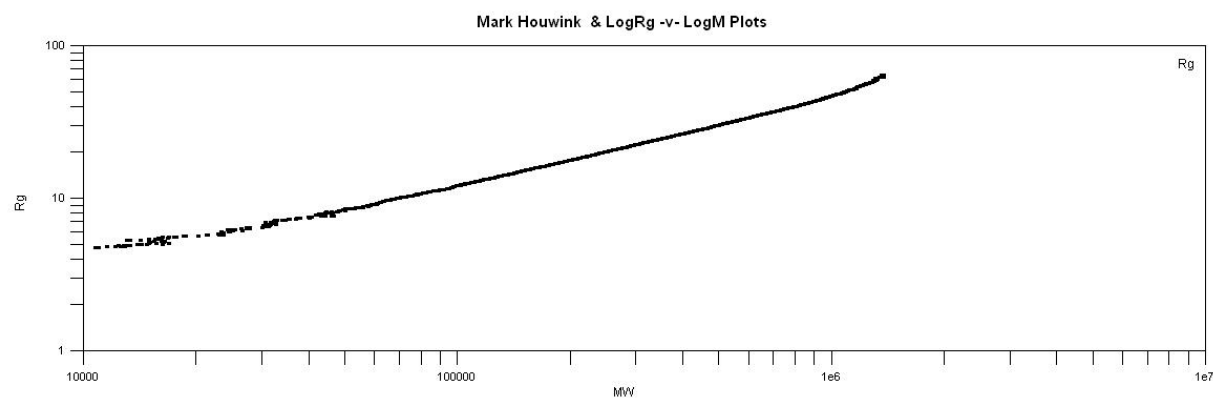

**Figure S28:** Diagram of  $R_g$  vs  $\log M_w$  for PP

**Table S1:** Average molecular weight, PDI, weight fraction, and bulk intrinsic viscosity of samples obtained by GPC analysis#

|                                 | <b>HDPE</b> | <b>LLDPE</b> | <b>LDPE</b> | <b>PP</b> |
|---------------------------------|-------------|--------------|-------------|-----------|
| $M_p$                           | 340620      | 96195        | 177110      | 152954    |
| $M_n$                           | 17667       | 44710        | 38573       | 72129     |
| $M_w$                           | 497526      | 190152       | 254206      | 289255    |
| $M_z$                           | 2340348     | 610487       | 827577      | 2047375   |
| $M_{z+1}$                       | 4419086     | 1204601      | 1782909     | 5379474   |
| Dispersity                      | 28.161      | 4.253        | 6.59026     | 4.01022   |
| 1000000-7000000 %               | 14.67       | 2.61679      | 4.29641     | 2.6503    |
| 100000-1000000 %                | 37.67       | 45.7568      | 52.135      | 58.7505   |
| 1000-100000 %                   | 47.22       | 51.6265      | 43.5627     | 38.3098   |
| Bulk Intrinsic Viscosity (dL/g) | 4.6645      | 3.0178       | 1.5927      | 2.224     |
